# Supplementary material for: Korean Registry for Improving Sepsis Survival (KISS): Protocol for a Multicenter Cohort of Adult Patients with Sepsis or Septic Shock
Source: PubMed Central journal article supplement — Infect Chemother. 2020 Mar 26;52(1):31–8. doi: 10.3947/ic.2020.52.1.31 (PMC7113452; doi:10.3947/ic.2020.52.1.31), 2020-03-26
Supplement: ic-52-31-s001.pdf [file ic-52-31-s001.pdf]

# Sepsis Cohort Clinical Record Form

|                |                            |                            |     |                |       |  |
|----------------|----------------------------|----------------------------|-----|----------------|-------|--|
| Name (initial) |                            |                            |     | ID             |       |  |
| Gender         | <input type="checkbox"/> M | <input type="checkbox"/> F | Age |                | years |  |
| Department     |                            | Ward                       |     | Admission Date |       |  |

## 1. Initial symptoms & positive P/Ex

|                                                                                                                                                                                                                                                                                                                                                                                                                                                                                                                     |
|---------------------------------------------------------------------------------------------------------------------------------------------------------------------------------------------------------------------------------------------------------------------------------------------------------------------------------------------------------------------------------------------------------------------------------------------------------------------------------------------------------------------|
| <input type="checkbox"/> Fever (onset:      day)                                                                                                                                                                                                                                                                                                                                                                                                                                                                    |
| Symptoms                                                                                                                                                                                                                                                                                                                                                                                                                                                                                                            |
| <input type="checkbox"/> CNS -<br><input type="checkbox"/> Urinary tract system -<br><input type="checkbox"/> Head and Neck -<br><input type="checkbox"/> Obstetric system -<br><input type="checkbox"/> Respiratory system -<br><input type="checkbox"/> Soft and muscular system -<br><input type="checkbox"/> Hepatobiliary system -<br><input type="checkbox"/> Vascular system -<br><input type="checkbox"/> GI system -<br><input type="checkbox"/> Primary bacteremia -<br><input type="checkbox"/> Others - |

## 2. Time to initiation of treatment

|                          |                              |                                                                                                                                                                                                                                                                                    |
|--------------------------|------------------------------|------------------------------------------------------------------------------------------------------------------------------------------------------------------------------------------------------------------------------------------------------------------------------------|
| <input type="checkbox"/> | Transfer from other hospital | <input type="checkbox"/> acute care hospital<br>name:<br>admission date: from                      to<br>initial date of antibiotics:<br><input type="checkbox"/> long-term care hospital<br>name:<br>admission date: from                      to<br>initial date of antibiotics: |
|--------------------------|------------------------------|------------------------------------------------------------------------------------------------------------------------------------------------------------------------------------------------------------------------------------------------------------------------------------|

### 3. Infection

#### Site of infection

|                                                                        |                                                                            |
|------------------------------------------------------------------------|----------------------------------------------------------------------------|
| <input type="checkbox"/> CNS (definitive, suspicious)                  | <input type="checkbox"/> Urinary tract system (definitive, suspicious)     |
| <input type="checkbox"/> Head and Neck (definitive, suspicious)        | <input type="checkbox"/> Obstetric system (definitive, suspicious)         |
| <input type="checkbox"/> Respiratory system (definitive, suspicious)   | <input type="checkbox"/> Soft and muscular system (definitive, suspicious) |
| <input type="checkbox"/> Hepatobiliary system (definitive, suspicious) | <input type="checkbox"/> Vascular system (definitive, suspicious)          |
| <input type="checkbox"/> GI system (definitive, suspicious)            | <input type="checkbox"/> Primary bacteremia (definitive, suspicious)       |
| <input type="checkbox"/> Others (definitive, suspicious)               |                                                                            |
| Diagnosis (ex. r/o Pneumonia):                                         |                                                                            |

#### Acquisition

|                                    |                                                          |                                                      |
|------------------------------------|----------------------------------------------------------|------------------------------------------------------|
| <input type="checkbox"/> community | <input type="checkbox"/> healthcare associated infection | <input type="checkbox"/> hospital acquired infection |
|------------------------------------|----------------------------------------------------------|------------------------------------------------------|

#### Sepsis category

| Status                                                  | Organ dysfunction                                          |
|---------------------------------------------------------|------------------------------------------------------------|
| <input type="checkbox"/> bacteremia                     | <input type="checkbox"/> hypotension                       |
| <input type="checkbox"/> septic shock                   | <input type="checkbox"/> kidney                            |
| <input type="checkbox"/> severe sepsis                  | <input type="checkbox"/> arterial hypoxemia                |
| <input type="checkbox"/> severe sepsis and septic shock | <input type="checkbox"/> Coagulation abnormality (INR>1.5) |
|                                                         | <input type="checkbox"/> Thrombocytopenia (<100,000)       |
|                                                         | <input type="checkbox"/> Hyperbilirubinemia (>2)           |
|                                                         | <input type="checkbox"/> Elevated lactate (above normal)   |

#### Pitt bacteremia score ( no bacteremia) - results of first blood culture

|                        |                                                                                 |                                                                                 |                                                                      |
|------------------------|---------------------------------------------------------------------------------|---------------------------------------------------------------------------------|----------------------------------------------------------------------|
| Fever                  | <input type="checkbox"/> $\leq 35^{\circ}\text{C}$ or $\geq 40^{\circ}\text{C}$ | <input type="checkbox"/> $35.1-36^{\circ}\text{C}$ or $39-39.9^{\circ}\text{C}$ | <input type="checkbox"/> $36.1-38.9^{\circ}\text{C}$                 |
| Hypotension            | <input type="checkbox"/> Y                                                      | <input type="checkbox"/> N                                                      |                                                                      |
| Mechanical ventilation | <input type="checkbox"/> Y                                                      | <input type="checkbox"/> N                                                      |                                                                      |
| Cardiac arrest         | <input type="checkbox"/> Y                                                      | <input type="checkbox"/> N                                                      |                                                                      |
| Mental status          | <input type="checkbox"/> Alert                                                  | <input type="checkbox"/> Disoriented                                            | <input type="checkbox"/> Stuporous <input type="checkbox"/> Comatose |

## 4. Patient – comorbidity

### Charlson comorbidity score

|                             |                                                                                                       |                           |                                                                                                 |
|-----------------------------|-------------------------------------------------------------------------------------------------------|---------------------------|-------------------------------------------------------------------------------------------------|
| MI history                  | <input type="checkbox"/> Y <input type="checkbox"/> N                                                 | Connective tissue disease | <input type="checkbox"/> Y <input type="checkbox"/> N                                           |
| CHF                         | <input type="checkbox"/> Y <input type="checkbox"/> N                                                 | Peptic ulcer disease      | <input type="checkbox"/> Y <input type="checkbox"/> N                                           |
| Peripheral vascular disease | <input type="checkbox"/> Y <input type="checkbox"/> N                                                 | Chronic renal disease     | <input type="checkbox"/> Y <input type="checkbox"/> N                                           |
| Cerebrovascular disease     | <input type="checkbox"/> Y <input type="checkbox"/> N                                                 | Hemiplegia                | <input type="checkbox"/> Y <input type="checkbox"/> N                                           |
| Dementia                    | <input type="checkbox"/> Y <input type="checkbox"/> N                                                 | Leukemia                  | <input type="checkbox"/> Y <input type="checkbox"/> N                                           |
| Chronic pulmonary disease   | <input type="checkbox"/> Y <input type="checkbox"/> N                                                 | Lymphoma                  | <input type="checkbox"/> Y <input type="checkbox"/> N                                           |
| Chronic liver disease       | <input type="checkbox"/> Y <input type="checkbox"/> N (LC <input type="checkbox"/> )                  | AIDS                      | <input type="checkbox"/> Y <input type="checkbox"/> N                                           |
| Diabetes                    | <input type="checkbox"/> Y <input type="checkbox"/> N<br>(end-organ damage <input type="checkbox"/> ) | Tumor                     | <input type="checkbox"/> Y <input type="checkbox"/> N<br>(metastasis <input type="checkbox"/> ) |

\*  alcoholics  smoker

### Indwelling devices

| devices                                              | Already                  | Newly                    | devices                                      | Already                  | Newly                    |
|------------------------------------------------------|--------------------------|--------------------------|----------------------------------------------|--------------------------|--------------------------|
| <input type="checkbox"/> Indwelling urinary catheter | <input type="checkbox"/> | <input type="checkbox"/> | <input type="checkbox"/> dialysis catheter   | <input type="checkbox"/> | <input type="checkbox"/> |
| <input type="checkbox"/> Gastrostomy tube            | <input type="checkbox"/> | <input type="checkbox"/> | <input type="checkbox"/> tracheostomy tube   | <input type="checkbox"/> | <input type="checkbox"/> |
| <input type="checkbox"/> PICC                        | <input type="checkbox"/> | <input type="checkbox"/> | <input type="checkbox"/> central IV catheter | <input type="checkbox"/> | <input type="checkbox"/> |
| <input type="checkbox"/> suprapubic urinary catheter | <input type="checkbox"/> | <input type="checkbox"/> | <input type="checkbox"/> NG tube             | <input type="checkbox"/> | <input type="checkbox"/> |
| <input type="checkbox"/> ventilator                  | <input type="checkbox"/> | <input type="checkbox"/> | <input type="checkbox"/> intubation tube     | <input type="checkbox"/> | <input type="checkbox"/> |
| <input type="checkbox"/> others                      |                          |                          |                                              |                          |                          |

## 5. Patient – severity

### APACH II/III score, SAPS II, SOFA, MODs, RAPS, MEWS score

|                                                                                                              |                                                                                                                          |                                |               |                              |                                                       |
|--------------------------------------------------------------------------------------------------------------|--------------------------------------------------------------------------------------------------------------------------|--------------------------------|---------------|------------------------------|-------------------------------------------------------|
| Vital sign                                                                                                   |                                                                                                                          |                                |               |                              |                                                       |
| HR                                                                                                           |                                                                                                                          | BP(SBP/DBP)                    |               | RR                           |                                                       |
| Temp                                                                                                         |                                                                                                                          | GCS                            |               | Pressure adjusted heart rate |                                                       |
| ABGA                                                                                                         |                                                                                                                          |                                |               |                              |                                                       |
| pH                                                                                                           |                                                                                                                          | pCO2                           |               | PO2                          |                                                       |
| FI02                                                                                                         |                                                                                                                          | CPAP or mechanical ventilation |               |                              | Y <input type="checkbox"/> N <input type="checkbox"/> |
| CHEM-7                                                                                                       |                                                                                                                          |                                |               |                              |                                                       |
| Na                                                                                                           |                                                                                                                          | K                              |               | CO2                          |                                                       |
| BUN                                                                                                          |                                                                                                                          | Cr                             |               | ARF                          | Y <input type="checkbox"/> N <input type="checkbox"/> |
| Bilirubin                                                                                                    |                                                                                                                          | PT (sec, %)                    |               |                              |                                                       |
| CBC                                                                                                          |                                                                                                                          |                                |               |                              |                                                       |
| WBC                                                                                                          | X10 <sup>9</sup> /L                                                                                                      | Hct                            | %             | Plt                          | 10 <sup>3</sup> /mm <sup>3</sup>                      |
| MISC                                                                                                         |                                                                                                                          |                                |               |                              |                                                       |
| Urine output                                                                                                 | mL/hr (or)                                                                                                               |                                | mL/24hrs (or) |                              | mL/8hrs                                               |
| Vasopressors                                                                                                 | <input type="checkbox"/> Y <input type="checkbox"/> N                                                                    | Age                            |               | Bilirubin                    |                                                       |
| Chronic disease                                                                                              | <input type="checkbox"/> metastatic cancer <input type="checkbox"/> Hematologic malignancy <input type="checkbox"/> AIDS |                                |               |                              |                                                       |
| Type of adm                                                                                                  | <input type="checkbox"/> scheduled surgical <input type="checkbox"/> medical <input type="checkbox"/> emergency surgical |                                |               |                              |                                                       |
| Severe organ system insufficiency or immunocompromised <input type="checkbox"/> Y <input type="checkbox"/> N |                                                                                                                          |                                |               |                              |                                                       |
| *Liver: LC, Heart: NYHA class IV, Respiratory: COPD, Renal: dialysis                                         |                                                                                                                          |                                |               |                              |                                                       |

### Glasgow Coma Scale

|                      |                                                     |          |
|----------------------|-----------------------------------------------------|----------|
| Eye Opening Response | Eyes open spontaneously                             | 4 points |
|                      | Eyes open to verbal command, speech, or shout       | 3 points |
|                      | Eyes open to pain (not applied to face)             | 2 points |
|                      | No eye opening                                      | 1 point  |
| Verbal response      | Oriented                                            | 5 points |
|                      | Confused conversation, but able to answer questions | 4 points |
|                      | Inappropriate responses, words discernible          | 3 points |
|                      | Incomprehensible sounds or speech                   | 2 points |
|                      | No verbal response                                  | 1 point  |
| Motor response       | Obeys commands for movement                         | 6 points |
|                      | Purposeful movement to painful stimulus             | 5 points |
|                      | Withdraws from pain                                 | 4 points |
|                      | Abnormal flexion, decorticate posture               | 3 points |
|                      | Extensor response, decerebrate posture              | 2 points |
|                      | No motor response                                   | 1 point  |

## 6. Lab.

|                                         |              |  |               |  |                  |  |
|-----------------------------------------|--------------|--|---------------|--|------------------|--|
| <input type="checkbox"/> CBC            | Hb           |  | WBC           |  | Platelet         |  |
| <input type="checkbox"/> renal function | BUN          |  | Cr            |  | GFR              |  |
| <input type="checkbox"/> electrolyte    | Na           |  | K             |  | HCO <sub>3</sub> |  |
|                                         | Ca           |  | Mg            |  | P                |  |
| <input type="checkbox"/> LFT            | AST          |  | ALT           |  | ALP              |  |
|                                         | GGT          |  | Bilirubin     |  | LDH              |  |
| <input type="checkbox"/> Coagulation    | PT           |  | aPTT          |  |                  |  |
| <input type="checkbox"/> Nutrition      | Protein      |  | Albumin       |  | T. cholest       |  |
|                                         | Triglyceride |  | LDL           |  | HDL              |  |
|                                         | Ferritin     |  | Thiamine      |  |                  |  |
| <input type="checkbox"/> Inflammation   | CRP          |  | Procalcitonin |  |                  |  |
| <input type="checkbox"/> Cardiac marker | BNP          |  | CK-MB         |  | Troponin         |  |
| <input type="checkbox"/> Circulation    | Lactate      |  |               |  |                  |  |
| <input type="checkbox"/> Hormone        | TSH          |  | Free T4       |  | HbA1c            |  |
|                                         | ACTH         |  | Cortisol      |  |                  |  |

**ABGA** (pH-CO<sub>2</sub>-O<sub>2</sub>-BE-SaO<sub>2</sub>)

### Pathogen (only initial culture study)

| Site   | Done or not                                                     | Pathogen | Resistant |
|--------|-----------------------------------------------------------------|----------|-----------|
| Blood  | <input type="checkbox"/> Done <input type="checkbox"/> Not done |          |           |
| Sputum | <input type="checkbox"/> Done <input type="checkbox"/> Not done |          |           |
| Bile   | <input type="checkbox"/> Done <input type="checkbox"/> Not done |          |           |
| Liver  | <input type="checkbox"/> Done <input type="checkbox"/> Not done |          |           |
| Urine  | <input type="checkbox"/> Done <input type="checkbox"/> Not done |          |           |
| Stool  | <input type="checkbox"/> Done <input type="checkbox"/> Not done |          |           |
| Pus    | <input type="checkbox"/> Done <input type="checkbox"/> Not done |          |           |
| Tissue | <input type="checkbox"/> Done <input type="checkbox"/> Not done |          |           |
| Others | Site:                                                           |          |           |

## 7. Antibiotics

**1<sup>st</sup> Empirical antibiotic therapy (monotherapy , combination therapy ) - duration: (    h/d)**

Beta-lactam

|                                  | Name |                                        | Name |
|----------------------------------|------|----------------------------------------|------|
| Natural penicillin               |      | Non-cephamycin 2 <sup>nd</sup> cepha   |      |
| Amonipenicillin                  |      | Anti-pseudomonal 3 <sup>rd</sup> cepha |      |
| Antistaphylococcal penicillin    |      | Other 3 <sup>rd</sup> cephalosporin    |      |
| b-lactamase inhibitor            |      | 4 <sup>th</sup> cephalosporin          |      |
| Piperacillin-tazobactam          |      | Monobactam                             |      |
| 1 <sup>st</sup> cephalosporin    |      | Ertapenem                              |      |
| Cephamycin 2 <sup>nd</sup> cepha |      | Non-ertapenem carbapenem               |      |

Others

|                           | Name |                   | Name |
|---------------------------|------|-------------------|------|
| 2 <sup>nd</sup> quinolone |      | Lincosamide       |      |
| 3 <sup>rd</sup> quinolone |      | Glycopeptide      |      |
| 4 <sup>th</sup> quinolone |      | Oxazolidinone     |      |
| Aminoglycoside            |      | Folate antagonist |      |
| Macrolide                 |      | Polymycin         |      |
| Tetracycline              |      |                   |      |

**2<sup>nd</sup> Empirical antibiotic therapy (monotherapy , combination therapy ) - duration: (    h/d)**

Beta-lactam

|                                  | Name |                                        | Name |
|----------------------------------|------|----------------------------------------|------|
| Natural penicillin               |      | Non-cephamycin 2 <sup>nd</sup> cepha   |      |
| Amonipenicillin                  |      | Anti-pseudomonal 3 <sup>rd</sup> cepha |      |
| Antistaphylococcal penicillin    |      | Other 3 <sup>rd</sup> cephalosporin    |      |
| b-lactamase inhibitor            |      | 4 <sup>th</sup> cephalosporin          |      |
| Piperacillin-tazobactam          |      | Monobactam                             |      |
| 1 <sup>st</sup> cephalosporin    |      | Ertapenem                              |      |
| Cephamycin 2 <sup>nd</sup> cepha |      | Non-ertapenem carbapenem               |      |

Others

|                           | Name |              | Name |
|---------------------------|------|--------------|------|
| 2 <sup>nd</sup> quinolone |      | Lincosamide  |      |
| 3 <sup>rd</sup> quinolone |      | Glycopeptide |      |



|                |  |  |  |  |  |  |  |  |  |
|----------------|--|--|--|--|--|--|--|--|--|
| Dopamine       |  |  |  |  |  |  |  |  |  |
| Norepinephrine |  |  |  |  |  |  |  |  |  |
| Vasopressin    |  |  |  |  |  |  |  |  |  |
| Dobutamine     |  |  |  |  |  |  |  |  |  |

|                |            |            |            |            |            |            |            |            |            |
|----------------|------------|------------|------------|------------|------------|------------|------------|------------|------------|
|                | <b>D19</b> | <b>D20</b> | <b>D21</b> | <b>D22</b> | <b>D23</b> | <b>D24</b> | <b>D25</b> | <b>D26</b> | <b>D27</b> |
| Dopamine       |            |            |            |            |            |            |            |            |            |
| Norepinephrine |            |            |            |            |            |            |            |            |            |
| Vasopressin    |            |            |            |            |            |            |            |            |            |
| Dobutamine     |            |            |            |            |            |            |            |            |            |

**\*Cumulative vasopressor index**

| <b>VASOPRESSOR</b>             | <b>1 Point</b> | <b>2 Points</b> | <b>3 Points</b>   | <b>4 Points</b> |
|--------------------------------|----------------|-----------------|-------------------|-----------------|
| Dopamine<br>(mcg/kg/min)       | 0 < dose ≤ 5   | 5 < dose ≤ 10   | 10 < dose ≤ 15    | <b>&gt;15</b>   |
| Epinephrine<br>(mcg/kg/min)    | ---            | 0 < dose ≤ 0.05 | 0.05 < dose ≤ 0.1 | <b>&gt;0.1</b>  |
| Norepinephrine<br>(mcg/kg/min) | ---            | 0 < dose ≤ 0.05 | 0.05 < dose ≤ 0.1 | <b>&gt;0.1</b>  |
| Phenylephrine<br>(mcg/kg/min)  | ---            | 0 < dose ≤ 0.4  | 0.4 < dose ≤ 0.8  | <b>&gt;0.8</b>  |
| Vasopressin<br>(units/min)     | ---            | ---             | ---               | <b>any dose</b> |

**Special treatment**

|               |                              |                             |
|---------------|------------------------------|-----------------------------|
| RBC           | <input type="checkbox"/> Yes | <input type="checkbox"/> No |
| FFP           | <input type="checkbox"/> Yes | <input type="checkbox"/> No |
| PC            | <input type="checkbox"/> Yes | <input type="checkbox"/> No |
| IVIG          | <input type="checkbox"/> Yes | <input type="checkbox"/> No |
| Albumin       | <input type="checkbox"/> Yes | <input type="checkbox"/> No |
| Vit C         | <input type="checkbox"/> Yes | <input type="checkbox"/> No |
| Thiamine      | <input type="checkbox"/> Yes | <input type="checkbox"/> No |
| Steroid       | <input type="checkbox"/> Yes | <input type="checkbox"/> No |
| Anti-thrombin | <input type="checkbox"/> Yes | <input type="checkbox"/> No |

**Mechanical ventilation (<24 hours,  not applied)**

|              |  |                  |  |
|--------------|--|------------------|--|
| Tidal volume |  | Plateau pressure |  |
| PEEP         |  | Driving pressure |  |
| FiO2         |  |                  |  |



## **10. Outcomes**

|                               |                                                                       |
|-------------------------------|-----------------------------------------------------------------------|
| Hospital stay                 | <b>Day</b>                                                            |
| Sepsis related mortality      | <input type="checkbox"/> Yes <input type="checkbox"/> No              |
| All-cause mortality           | <input type="checkbox"/> Yes <input type="checkbox"/> No<br>(cause: ) |
| Discharge to home or hospital | <input type="checkbox"/> Home <input type="checkbox"/> Hospital       |
